# Supplementary material
Source: PubMed Central journal article supplement (PMC2504818)
Supplement: 0801850105_0801850105SI.pdf [file 0801850105_0801850105SI.pdf]

# Supporting Information

Materese *et al.* 10.1073/pnas.0801850105

SI Text

**Table S1. Contact populations between the first 7 N-terminal residues or the 11 residues of the flexible binding loop and the rest of the protein**

| Contact | Type  | Basin 1.1 | Basin 1.2 | Basin 1.3 | Basin 1.4 |
|---------|-------|-----------|-----------|-----------|-----------|
| T1/L7   | HO/SC | 0.0       | 0.0       | 0.4       | 0.6       |
| T1/Y49  | HO/SC | 0.6       | 0.0       | 0.0       | 0.0       |
| E2/S5   | HB/SC | 0.0       | 0.0       | 0.5       | 0.2       |
| E2/E6   | WM/SC | 0.0       | 0.0       | 0.6       | 0.7       |
| E2/L7   | HB/BB | 0.0       | 0.0       | 0.7       | 1.0       |
| E2/R48  | SB/SC | 1.0       | 0.0       | 0.0       | 0.0       |
| E2/Y49  | HB/BB | 1.0       | 0.2       | 0.1       | 0.0       |
| E2/R51  | SB/SC | 0.9       | 0.0       | 0.0       | 0.0       |
| F3/L7   | HO/SC | 0.0       | 0.4       | 0.6       | 0.8       |
| F3/R48  | HO/SC | 0.8       | 0.0       | 0.0       | 0.0       |
| F3/V52  | HO/SC | 0.0       | 0.6       | 0.4       | 0.4       |
| G4/L7   | HB/BB | 0.0       | 0.4       | 0.6       | 1.0       |
| G4/K8   | HB/BS | 0.0       | 0.0       | 0.1       | 0.5       |
| G4/W10  | HO/SC | 0.0       | 0.0       | 0.3       | 0.7       |
| G4/L47  | HB/BB | 0.9       | 0.0       | 0.2       | 0.0       |
| G4/Y49  | HO/SC | 0.6       | 0.0       | 0.0       | 0.0       |
| S5/K8   | HB/BS | 0.0       | 0.0       | 0.3       | 0.5       |
| S5/L47  | HO/BS | 0.6       | 0.1       | 0.1       | 0.2       |
| E6/V69  | HO/SC | 0.7       | 0.1       | 0.0       | 0.0       |
| L7/V52  | HO/SC | 0.5       | 0.2       | 0.0       | 0.0       |
| L7/V66  | HO/SC | 0.0       | 0.8       | 0.0       | 0.0       |
| L7/P67  | HO/SC | 0.6       | 0.0       | 0.0       | 0.0       |
| L7/H68  | HB/BB | 1.0       | 0.2       | 0.0       | 0.0       |
| L37/V43 | HO/SC | 0.1       | 0.8       | 0.8       | 0.9       |
| P38/S41 | HB/BB | 0.1       | 0.6       | 0.6       | 0.7       |
| L47/V52 | HO/SC | 0.0       | 0.0       | 0.5       | 0.0       |
| L47/V69 | HO/SC | 0.0       | 0.6       | 0.5       | 0.6       |

Key: HO, hydrophobic; SB, salt bridge; HB, hydrogen bond; WM, water-mediated; BB, backbone/backbone; BS, backbone/side chain; SC, side chain/side chain.
